# Supplementary material
Source: publisher site journal article supplement (https://www.dovepress.com/article/329900)
Supplement: Supplementary file 1 [file get_supplementary_file.php]

## Appendix

Table1 Detailed site list of 29 EGFR gene mutations detected by ARMS (Amoy Diagnostics, Xiamen, China)

| Name           | Mutation         | Exon | Base change                    | Cosmic ID |
|----------------|------------------|------|--------------------------------|-----------|
| Ex18-mutant-1  | G719A            | 18   | 2156G>C                        | 6239      |
| Ex18-mutant-2  | G719S            | 18   | 2155G>A                        | 6252      |
| Ex18-mutant-3  | G719C            | 18   | 2155G>T                        | 6253      |
| Ex19-mutant-1  | E746_A750del (1) | 19   | 2235_2249del15                 | 6223      |
| Ex19-mutant-2  | E746_A750del (2) | 19   | 2236_2250del15                 | 6225      |
| Ex19-mutant-3  | L747_P753>S      | 19   | 2240_2257del18                 | 12370     |
| Ex19-mutant-4  | E746_T751>I      | 19   | 2235_2252>AAT (complex)        | 13551     |
| Ex19-mutant-5  | E746_T751del     | 19   | 2236_2253del18                 | 12728     |
| Ex19-mutant-6  | E746_T751>A      | 19   | 2237_2251del15                 | 12678     |
| Ex19-mutant-7  | E746_S752>A      | 19   | 2237_2254del18                 | 12367     |
| Ex19-mutant-8  | E746_S752>V      | 19   | 2237_2250>T (complex)          | 12384     |
| Ex19-mutant-9  | E746_S752>D      | 19   | 2238_2255del18                 | 6220      |
| Ex19-mutant-10 | L747_A750>P      | 19   | 2238_2248>GC (complex)         | 12422     |
| Ex19-mutant-11 | L747_T751>Q      | 19   | 2238_2252>GCA (complex)        | 12419     |
| Ex19-mutant-12 | L747_E749del     | 19   | 2239_2247del9                  | 6218      |
| Ex19-mutant-13 | L747_T751del     | 19   | 2239_2253del15                 | 6254      |
| Ex19-mutant-14 | L747_S752del     | 19   | 2239_2256del18                 | 6255      |
| Ex19-mutant-15 | L747_A750>P      | 19   | 2239_2248TTAAGAGAAG>C(complex) | 12382     |
| Ex19-mutant-16 | L747_P753>Q      | 19   | 2239_2258>CA (complex)         | 12387     |
| Ex19-mutant-17 | L747_T751>S      | 19   | 2240_2251del12                 | 6210      |
| Ex19-mutant-18 | L747_T751del     | 19   | 2240_2254del15                 | 12369     |
| Ex19-mutant-19 | L747_T751>P      | 19   | 2239_2251>C(complex)           | 12383     |
| Ex20-mutant-1  | T790M            | 20   | 2369C>T                        | 6240      |
| Ex20-mutant-2  | S768I            | 20   | 2303G>T                        | 6241      |
| Ex20-mutant-3  | H773_V774insH    | 20   | 2319_2320insCAC                | 12377     |
| Ex20-mutant-4  | D770_N771insG    | 20   | 2310_2311insGGT                | 12378     |
| Ex20-mutant-5  | V769_D770insASV  | 20   | 2307_2308insgecagcgtg          | 12376     |
| Ex21-mutant-1  | L858R            | 21   | 2573T>G                        | 6224      |
| Ex21-mutant-2  | L861Q            | 21   | 2582T>A                        | 6213      |

Notes: The ADx EGFR 29 Mutation Kit (Amoy Diagnostics, Xiamen, China) , using AMRS-PCR to detect previously predefined point mutations, covers 29 point mutations of EGFR including exon 18 G719X (G719A, G719S, G719C), exon 19 deletions, exon 20 103 insertions (three types of insertions), exon 20 T790M and S768I, and exon 21 L858R and 104 L861Q mutation et al.

## Appendix

Table2 Original data

| Admission number | Age (years) | Sex    | Smoking history | ECOG score | TNM stage | Tissue biopsy site | Sample type      | EGFR-TKIs | Treatment response | Initial EGFR mutation | PFS   | Post-progression EGFR gene status |
|------------------|-------------|--------|-----------------|------------|-----------|--------------------|------------------|-----------|--------------------|-----------------------|-------|-----------------------------------|
| 142459           | 43          | Male   | Never           | 1          | IV        | Primary            | Tumor tissue     | Gefitinib | SD                 | G719X-19Del           | 2.27  | T790M                             |
| 144689           | 54          | Male   | Never           | 1          | IV        | Primary            | Tumor tissue     | Icotinib  | SD                 | L858R                 | 2.7   | T790M                             |
| 152340           | 51          | Female | Never           | 2          | IV        | Primary            | Tumor tissue     | Gefitinib | SD                 | L858R                 | 3.12  | L858R                             |
| 140272           | 70          | Female | Ever            | 1          | IV        | Primary            | Tumor tissue     | Icotinib  | PR                 | L858R                 | 3.78  | Mutation clearance                |
| 177274           | 58          | Male   | Ever            | 1          | IV        | Primary            | Tumor tissue     | Icotinib  | SD                 | L858R                 | 5     | Mutation clearance                |
| 165010           | 64          | Female | Never           | 1          | IV        | Primary            | Tumor tissue     | Gefitinib | SD                 | 19Del                 | 5.62  | T790M                             |
| 177335           | 54          | Male   | Never           | 1          | IV        | Primary            | Tumor tissue     | Icotinib  | PD                 | 19Del                 | 1.61  | 19Del                             |
| 163041           | 54          | Female | Never           | 1          | IV        | Secondary          | Tumor tissue     | Gefitinib | PR                 | L858R                 | 11.97 | L858R-T790M                       |
| 128591           | 61          | Male   | Never           | 1          | IV        | Primary            | Tumor tissue     | Icotinib  | PR                 | L858R                 | 49.15 | Mutation clearance                |
| 157781           | 55          | Male   | Never           | 0          | IV        | Primary            | Tumor tissue     | Gefitinib | SD                 | L858R                 | 5.72  | L858R                             |
| 90398            | 63          | Male   | Ever            | 1          | IV        | Primary            | Tumor tissue     | Gefitinib | PR                 | 19Del                 | 7.13  | T790M                             |
| 139096           | 64          | Male   | Ever            | 0          | IV        | Primary            | Tumor tissue     | Icotinib  | SD                 | L858R                 | 5.95  | Mutation clearance                |
| 175684           | 54          | Male   | Ever            | 1          | IV        | Primary            | Tumor tissue     | Icotinib  | SD                 | 19Del                 | 6.15  | T790M                             |
| 144505           | 49          | Male   | Ever            | 1          | IV        | Primary            | Tumor tissue     | Icotinib  | SD                 | L858R                 | 7.13  | Mutation clearance                |
| 137041           | 74          | Female | Ever            | 1          | IV        | Primary            | Tumor tissue     | Icotinib  | PR                 | 19Del                 | 15.45 | T790M                             |
| 171104           | 61          | Male   | Ever            | 1          | IV        | Primary            | Tumor tissue     | Icotinib  | SD                 | 19Del                 | 7.17  | Mutation clearance                |
| 141387           | 62          | Male   | Never           | 0          | IV        | Primary            | Tumor tissue     | Afatinib  | PR                 | L858R                 | 5.03  | Mutation clearance                |
| 137044           | 78          | Female | Ever            | 1          | IV        | Primary            | Tumor tissue     | Gefitinib | PR                 | 19Del                 | 13.81 | 19Del-T790M                       |
| 177151           | 53          | Male   | Ever            | 1          | IV        | Primary            | Tumor tissue     | Icotinib  | SD                 | L858R                 | 7.46  | Mutation clearance                |
| 169597           | 49          | Female | Never           | 1          | IV        | Secondary          | Tumor tissue     | Icotinib  | SD                 | L858R                 | 8.09  | Mutation clearance                |
| 54024            | 56          | Female | Never           | 1          | IV        | Primary            | Tumor tissue     | Icotinib  | PD                 | 19Del                 | 1.08  | Mutation clearance                |
| 171954           | 51          | Male   | Never           | 1          | IV        | Secondary          | Tumor tissue     | Icotinib  | SD                 | 19Del                 | 8.61  | T790M                             |
| 175207           | 46          | Female | Never           | 0          | IV        | Primary            | Tumor tissue     | Icotinib  | PR                 | L858R                 | 8.94  | L858R                             |
| 157395           | 51          | Female | Never           | 1          | IV        | Secondary          | Pleural effusion | Gefitinib | PR                 | L858R                 | 12.56 | T790M                             |
| 124657           | 47          | Female | Never           | 2          | IV        | Primary            | Tumor tissue     | Icotinib  | PR                 | 19Del                 | 21.37 | T790M                             |
| 166097           | 58          | Female | Never           | 1          | IV        | Primary            | Tumor tissue     | Gefitinib | PR                 | L858R                 | 13.18 | Mutation clearance                |
| 166920           | 46          | Female | Never           | 1          | IV        | Primary            | Tumor tissue     | Icotinib  | SD                 | 19Del                 | 9.07  | T790M                             |
| 133779           | 75          | Female | Never           | 1          | IV        | Primary            | Tumor tissue     | Gefitinib | SD                 | L858R                 | 9.11  | T790M                             |
| 169173           | 50          | Female | Never           | 0          | IV        | Primary            | Tumor tissue     | Icotinib  | SD                 | 19Del                 | 9.5   | T790M                             |
| 168404           | 58          | Male   | Ever            | 1          | IV        | Primary            | Tumor tissue     | Afatinib  | PR                 | 19Del                 | 5.29  | 19Del                             |
| 142928           | 68          | Male   | Never           | 1          | IV        | Primary            | Tumor tissue     | Gefitinib | PD                 | 19Del                 | 1.05  | Mutation clearance                |
| 162218           | 70          | Female | Never           | 1          | IV        | Primary            | Tumor tissue     | Icotinib  | PR                 | 19Del                 | 10.78 | 19Del-T790M                       |
| 137417           | 52          | Male   | Never           | 1          | IV        | Primary            | Tumor tissue     | Icotinib  | PR                 | 19Del                 | 10.55 | T790M                             |
| 151269           | 77          | Male   | Ever            | 1          | IV        | Primary            | Tumor tissue     | Gefitinib | SD                 | L858R                 | 9.5   | L858R                             |
| 140452           | 56          | Male   | Never           | 0          | IV        | Primary            | Tumor tissue     | Icotinib  | PR                 | L858R                 | 33.44 | Mutation clearance                |
| 173888           | 51          | Female | Never           | 1          | IV        | Primary            | Tumor tissue     | Icotinib  | PR                 | 19Del                 | 9.67  | T790M                             |
| 176234           | 55          | Female | Never           | 1          | IV        | Primary            | Tumor tissue     | Icotinib  | PR                 | 19Del                 | 10.65 | Mutation clearance                |

## Appendix

| Admission number | Age (years) | Sex    | Smoking history | ECOG score | TNM stage | Tissue biopsy site | Sample type      | EGFR-TKIs | Treatment response | Initial EGFR mutation         | PFS   | Post-progression EGFR gene status |
|------------------|-------------|--------|-----------------|------------|-----------|--------------------|------------------|-----------|--------------------|-------------------------------|-------|-----------------------------------|
| 176686           | 61          | Male   | Ever            | 1          | IV        | Primary            | Tumor tissue     | Icotinib  | PR                 | 19Del                         | 10.26 | T790M                             |
| 142897           | 71          | Male   | Never           | 0          | IV        | Secondary          | Pleural effusion | Gefitinib | PR                 | 19Del                         | 17.98 | Mutation clearance                |
| 140385           | 58          | Female | Never           | 1          | IV        | Secondary          | Tumor tissue     | Icotinib  | PR                 | L858R                         | 7.96  | T790M                             |
| 139953           | 59          | Male   | Never           | 0          | IV        | Primary            | Tumor tissue     | Icotinib  | PR                 | L858R                         | 10.55 | Mutation clearance                |
| 152799           | 45          | Male   | Ever            | 0          | IV        | Secondary          | Pleural effusion | Gefitinib | PR                 | 19Del                         | 24.89 | Mutation clearance                |
| 150253           | 51          | Male   | Never           | 1          | IV        | Primary            | Tumor tissue     | Icotinib  | PR                 | 19Del                         | 10.59 | T790M                             |
| 171667           | 61          | Female | Never           | 1          | IV        | Secondary          | Pleural effusion | Icotinib  | PR                 | 19Del                         | 10.68 | Mutation clearance                |
| 158075           | 41          | Male   | Ever            | 2          | IV        | Secondary          | Tumor tissue     | Gefitinib | PR                 | 19Del                         | 10.82 | T790M                             |
| 159573           | 45          | Male   | Ever            | 1          | IV        | Primary            | Tumor tissue     | Gefitinib | PR                 | 19Del                         | 10.32 | Mutation clearance                |
| 154478           | 55          | Male   | Never           | 1          | IV        | Secondary          | Tumor tissue     | Gefitinib | PR                 | 19Del                         | 9.7   | 19Del                             |
| 173353           | 67          | Female | Never           | 0          | IV        | Secondary          | Pleural effusion | Icotinib  | PR                 | L858R-L861Q                   | 12.26 | Mutation clearance                |
| 170881           | 50          | Female | Never           | 0          | IV        | Primary            | Tumor tissue     | Gefitinib | SD                 | L858R                         | 11.01 | L858R                             |
| 166433           | 60          | Female | Never           | 1          | IV        | Secondary          | Tumor tissue     | Icotinib  | PR                 | 19Del                         | 4.57  | T790M                             |
| 142996           | 60          | Male   | Ever            | 1          | IV        | Primary            | Tumor tissue     | Gefitinib | PR                 | 19Del                         | 11.24 | Mutation clearance                |
| 166064           | 49          | Male   | Ever            | 0          | IV        | Secondary          | Pleural effusion | Gefitinib | PR                 | 19Del                         | 11.64 | T790M                             |
| 170797           | 52          | Female | Never           | 1          | IV        | Primary            | Tumor tissue     | Gefitinib | PR                 | L858R                         | 7.96  | L858R                             |
| 146878           | 63          | Male   | Never           | 0          | IV        | Primary            | Tumor tissue     | Gefitinib | SD                 | L858R                         | 11.8  | T790M                             |
| 169443           | 62          | Male   | Ever            | 1          | IV        | Secondary          | Tumor tissue     | Gefitinib | PR                 | 19Del                         | 13.61 | 19Del                             |
| 166401           | 65          | Male   | Never           | 1          | IV        | Primary            | Tumor tissue     | Icotinib  | PR                 | L858R                         | 13.58 | T790M                             |
| 163465           | 47          | Female | Never           | 1          | IV        | Secondary          | Pleural effusion | Gefitinib | PR                 | 19Del                         | 12.85 | Mutation clearance                |
| 162401           | 55          | Male   | Ever            | 1          | IV        | Primary            | Tumor tissue     | Icotinib  | PR                 | 19Del                         | 17.59 | Mutation clearance                |
| 159183           | 54          | Male   | Ever            | 1          | IV        | Primary            | Tumor tissue     | Gefitinib | PR                 | 19Del                         | 21.57 | Mutation clearance                |
| 124733           | 61          | Female | Never           | 1          | IV        | Primary            | Tumor tissue     | Icotinib  | PR                 | L858R                         | 12    | Mutation clearance                |
| 151504           | 49          | Female | Never           | 1          | IV        | Primary            | Tumor tissue     | Icotinib  | PR                 | 19Del                         | 10.62 | Mutation clearance                |
| 144142           | 56          | Female | Never           | 1          | IV        | Primary            | Tumor tissue     | Gefitinib | PR                 | 19Del                         | 13.08 | Mutation clearance                |
| 163328           | 54          | Female | Never           | 0          | IV        | Primary            | Tumor tissue     | Icotinib  | PR                 | 19Del                         | 14.14 | T790M                             |
| 142970           | 65          | Female | Never           | 2          | IV        | Secondary          | Tumor tissue     | Icotinib  | PR                 | 19Del                         | 3.32  | 19Del                             |
| 154828           | 36          | Male   | Ever            | 1          | IV        | Primary            | Tumor tissue     | Gefitinib | PD                 | 19Del                         | 0.79  | T790M                             |
| 163578           | 33          | Male   | Ever            | 2          | IV        | Primary            | Tumor tissue     | Gefitinib | PR                 | 19Del                         | 15.65 | 19Del                             |
| 144876           | 62          | Female | Never           | 1          | IV        | Secondary          | Pleural effusion | Gefitinib | SD                 | 19Del                         | 15.98 | 19Del-T790M                       |
| 139043           | 48          | Female | Never           | 1          | IV        | Primary            | Tumor tissue     | Icotinib  | PR                 | L858R                         | 20.94 | Mutation clearance                |
| 155530           | 51          | Female | Never           | 1          | IV        | Secondary          | Pleural effusion | Gefitinib | PR                 | 19Del                         | 22.26 | T790M                             |
| 150205           | 53          | Male   | Ever            | 1          | IV        | Primary            | Tumor tissue     | Icotinib  | PR                 | 19Del                         | 24.33 | Mutation clearance                |
| 155295           | 62          | Male   | Never           | 1          | IV        | Primary            | Tumor tissue     | Icotinib  | PR                 | L858R                         | 22.98 | Mutation clearance                |
| 141243           | 58          | Female | Never           | 1          | IV        | Primary            | Tumor tissue     | Icotinib  | PR                 | 19Del-L858R compound mutation | 13.08 | Mutation clearance                |
| 151527           | 81          | Female | Never           | 0          | IV        | Primary            | Tumor tissue     | Icotinib  | PR                 | L858R                         | 23.61 | Mutation clearance                |
| 147681           | 60          | Female | Never           | 1          | IV        | Primary            | Tumor tissue     | Icotinib  | PR                 | L858R                         | 6.08  | T790M                             |
| 138154           | 50          | Female | Never           | 0          | IV        | Primary            | Tumor tissue     | Icotinib  | PR                 | 19Del                         | 10.72 | T790M                             |
| 152794           | 72          | Male   | Never           | 1          | IV        | Primary            | Tumor tissue     | Icotinib  | PR                 | L858R-L861Q                   | 9.07  | L858R-L861Q                       |
| 80060            | 69          | Female | Never           | 1          | IV        | Primary            | Tumor tissue     | Icotinib  | PR                 | L858R                         | 23.61 | L858R-T790M                       |

## Appendix

| Admission number | Age (years) | Sex    | Smoking history | ECOG score | TNM stage | Tissue biopsy site | Sample type      | EGFR-TKIs | Treatment response | Initial EGFR mutation         | PFS   | Post-progression EGFR gene status |
|------------------|-------------|--------|-----------------|------------|-----------|--------------------|------------------|-----------|--------------------|-------------------------------|-------|-----------------------------------|
| 148597           | 69          | Female | Never           | 1          | IV        | Primary            | Tumor tissue     | Icotinib  | PR                 | 19Del                         | 27.55 | Mutation clearance                |
| 139257           | 68          | Female | Never           | 1          | IV        | Primary            | Tumor tissue     | Icotinib  | PR                 | L858R                         | 28.04 | T790M                             |
| 155777           | 67          | Male   | Ever            | 1          | IV        | Primary            | Tumor tissue     | Gefitinib | PR                 | 19Del                         | 29.56 | T790M                             |
| 160477           | 53          | Female | Never           | 2          | IV        | Primary            | Tumor tissue     | Gefitinib | PR                 | 19Del                         | 23.7  | 19Del                             |
| 166806           | 53          | Female | Never           | 1          | IV        | Secondary          | Tumor tissue     | Gefitinib | PD                 | 19Del                         | 1.64  | T790M                             |
| 165818           | 46          | Male   | Ever            | 0          | IV        | Primary            | Tumor tissue     | Afatinib  | PR                 | 19Del-L858R compound mutation | 19.53 | Mutation clearance                |
| 145418           | 60          | Female | Never           | 1          | IV        | Primary            | Tumor tissue     | Icotinib  | PR                 | 19Del                         | 31.4  | T790M                             |
| 137361           | 44          | Male   | Ever            | 1          | IV        | Primary            | Tumor tissue     | Icotinib  | PR                 | 19Del                         | 32.09 | T790M                             |
| 146287           | 64          | Female | Never           | 1          | IV        | Primary            | Tumor tissue     | Icotinib  | PR                 | L858R                         | 32.35 | Mutation clearance                |
| 165879           | 48          | Female | Never           | 0          | IV        | Secondary          | Pleural effusion | Afatinib  | SD                 | 19Del                         | 4.73  | L858R                             |
| 151138           | 45          | Female | Never           | 1          | IV        | Primary            | Tumor tissue     | Afatinib  | SD                 | EGFR G719X mutation           | 5.62  | G719X-L861Q                       |

Notes: It can be calculated that the inconsistency rate of EGFR mutations in the same sample type (72.22%) and in the different sample types (92.31%) from original data.
